# Supplementary material
Source: MDPI journal article supplement (https://www.mdpi.com/2073-4441/15/21/3714)
Supplement: s1 [file s1 › water-2542526-supplementary.pdf]

# Supporting Information

## Study on plugging material and plugging mechanism of crude oil sand water filter pipe

Wenhui Zhang <sup>1</sup>, Qingfeng Liu <sup>2</sup>, Hengyu Chen <sup>1</sup>, Huibin Sheng <sup>3</sup>, Jingen Yan <sup>4</sup>, Yongtao Gu <sup>4</sup>, Xianqiang Huang <sup>5,\*</sup> and Bingchuan Yang <sup>1,5,\*</sup>

<sup>1</sup> College of Chemistry and Chemical Engineering, Qilu Normal University, Jinan 250013, China

<sup>2</sup> Shengli Oil Field Zhongsheng Petroleum Development Company, Dongying 257237, China

<sup>3</sup> Shandong Institute of Geophysical and Geochemical Exploration, Jinan 250013, China

<sup>4</sup> Gudong Oil Production Plant, Shengli Oilfield Company, China Petroleum Chemical Corporation, Dongying 257237, China

<sup>5</sup> School of Chemistry and Chemical Engineering, Liaocheng University, Liaocheng 252059, China

\* Correspondence: hxq@lcu.edu.cn (X.H.); lewis19886@163.com (B.Y.)

## **Instrumentation**

The X-ray diffraction (PXRD) patterns were recorded on a Rigaku Smartlab3 X-ray Powder Diffractometer equipped with a Cu sealed tube ( $\lambda = 1.54178 \text{ \AA}$ ) in the range of  $5^\circ$  to  $50^\circ$  at room temperature. The Fourier transform infrared spectrometry (FT-IR) analyses were measured on a Nicolet 5700 spectrophotometer in the range  $400\text{--}4000 \text{ cm}^{-1}$ .  $^1\text{H}$  NMR and  $^{13}\text{C}$  NMR spectra were recorded on 400 MHz (Bruker) instrument,  $\text{CDCl}_3$  (7.26 ppm for  $^1\text{H}$  NMR, 77.16 ppm for  $^{13}\text{C}$  NMR) was used as a reference.

## 1. PXRD spectra of Blockage

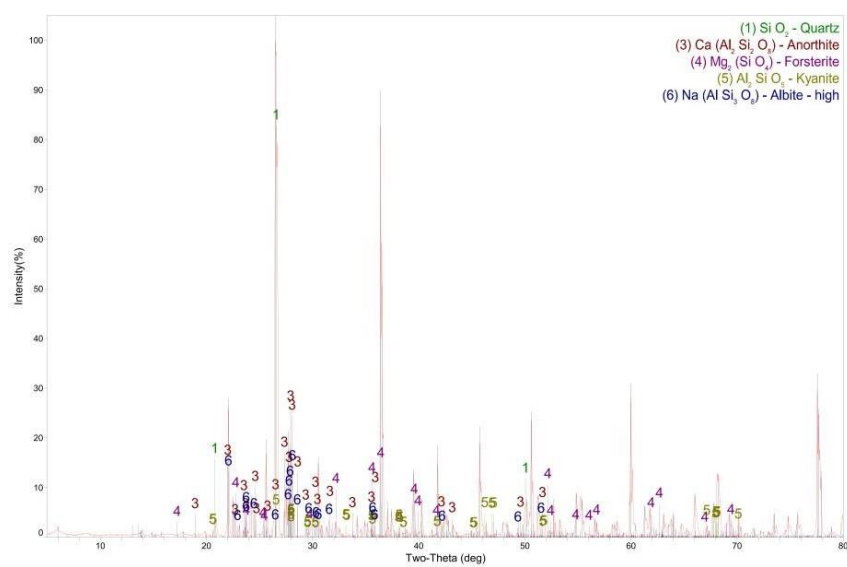

Figure S1. Blockage PXRD powder diffraction pattern

## 2. FT-IR spectra of Blockage

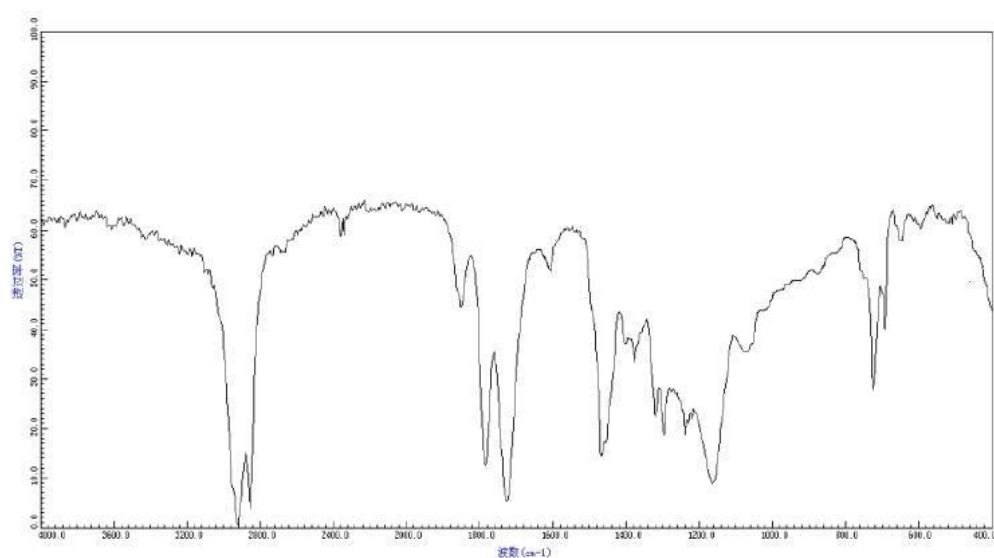

Figure S2. FT-IR spectra of oil pipeline blockage

### 3.Copies of the NMR Spectra

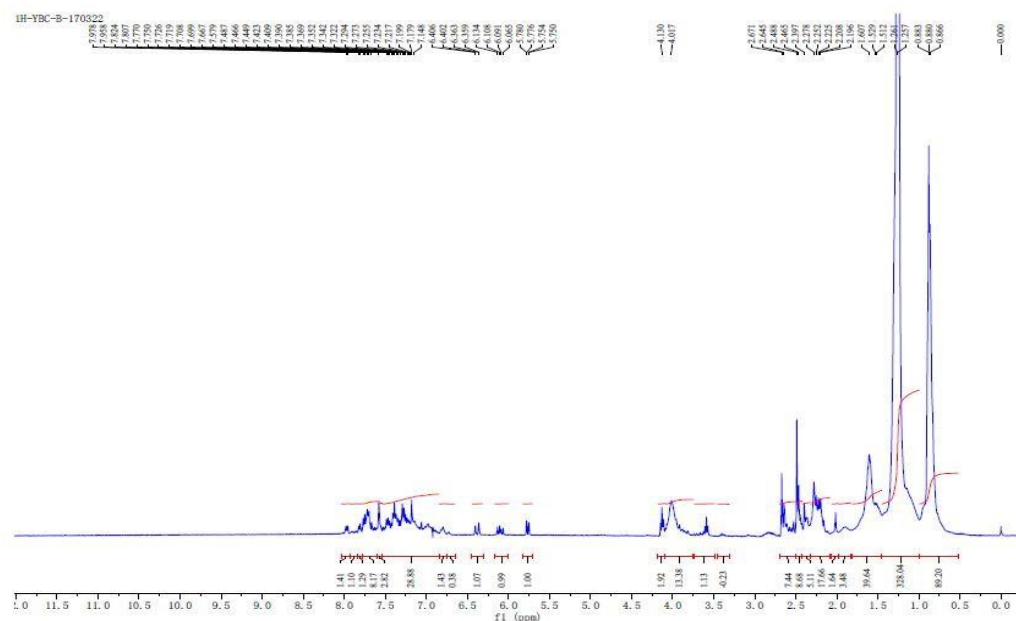

Figure S3. Oil production pipeline blockage  $^1\text{H}$  NMR test results

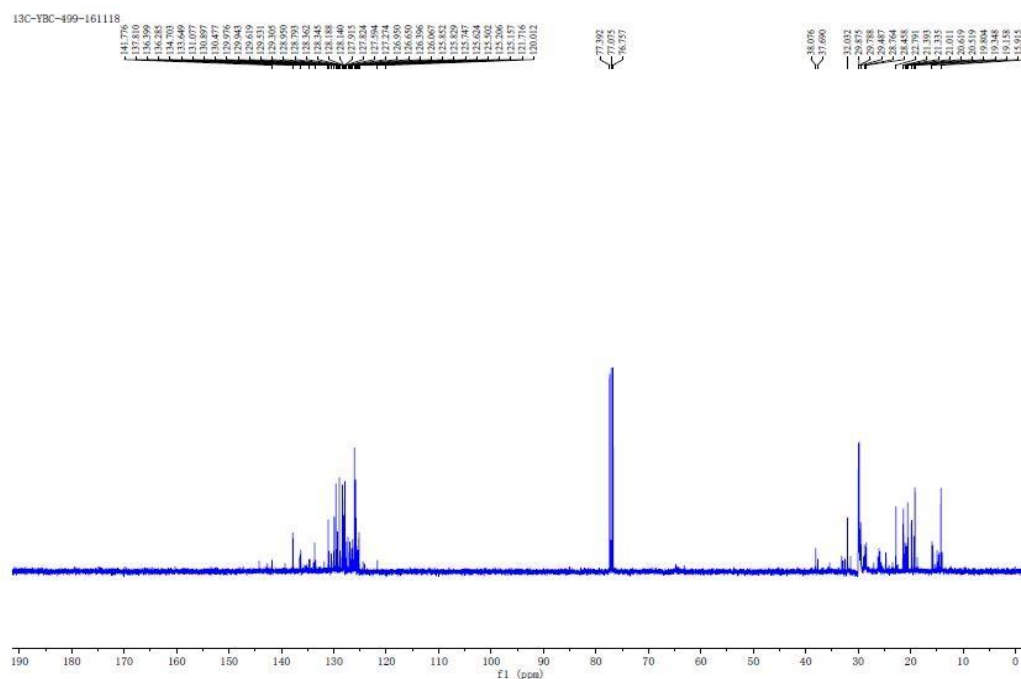

Figure S4. Oil production pipeline blockage  $^{13}\text{C}$  NMR test results

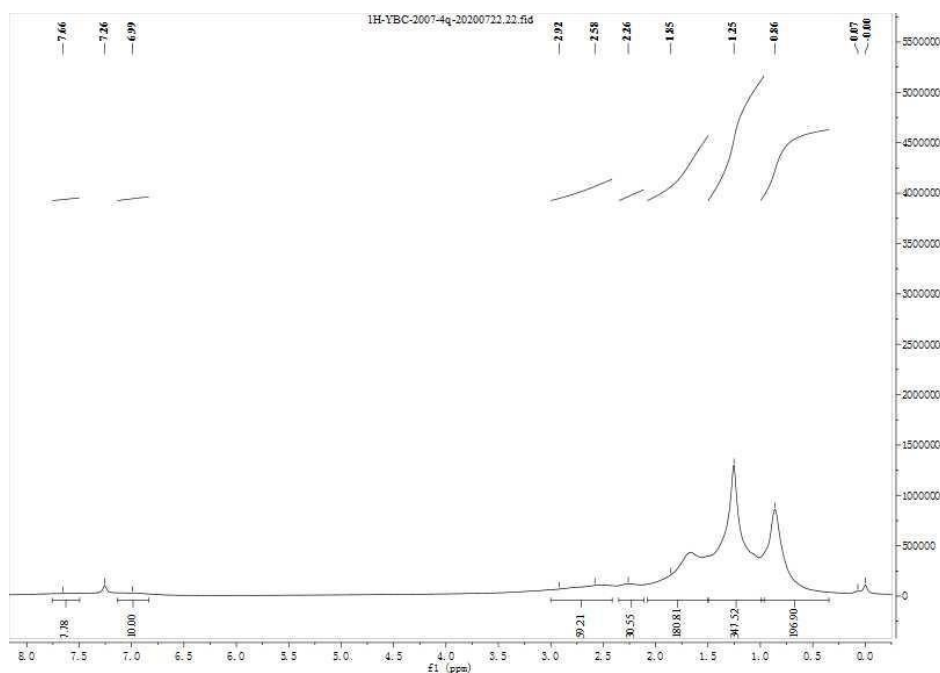

Figure S5. 4-zone blockage <sup>1</sup>H NMR test results

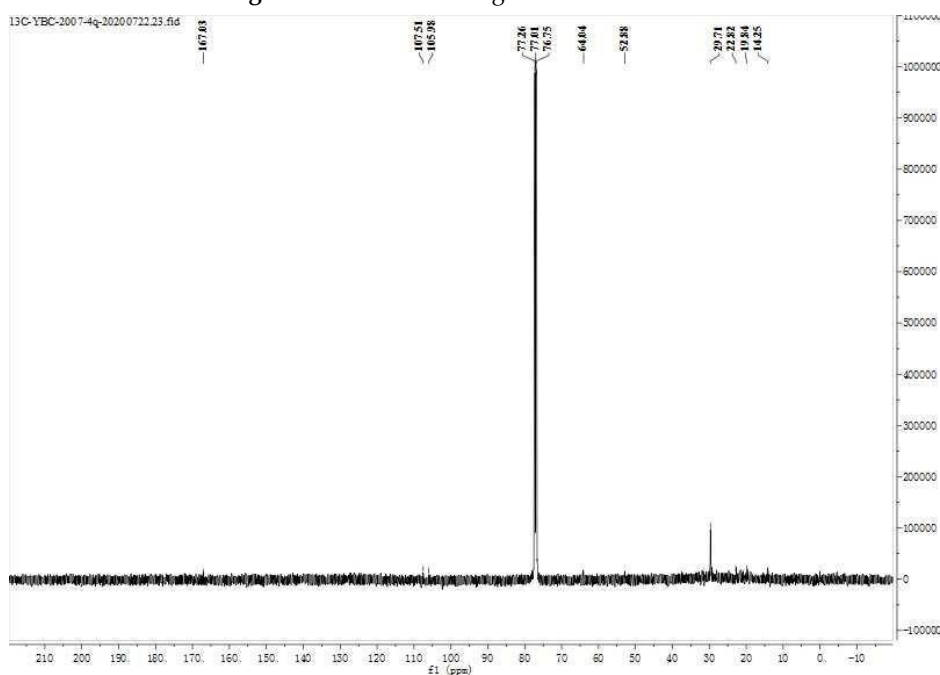

Figure S6. 4-zone blockage <sup>13</sup>C NMR test results

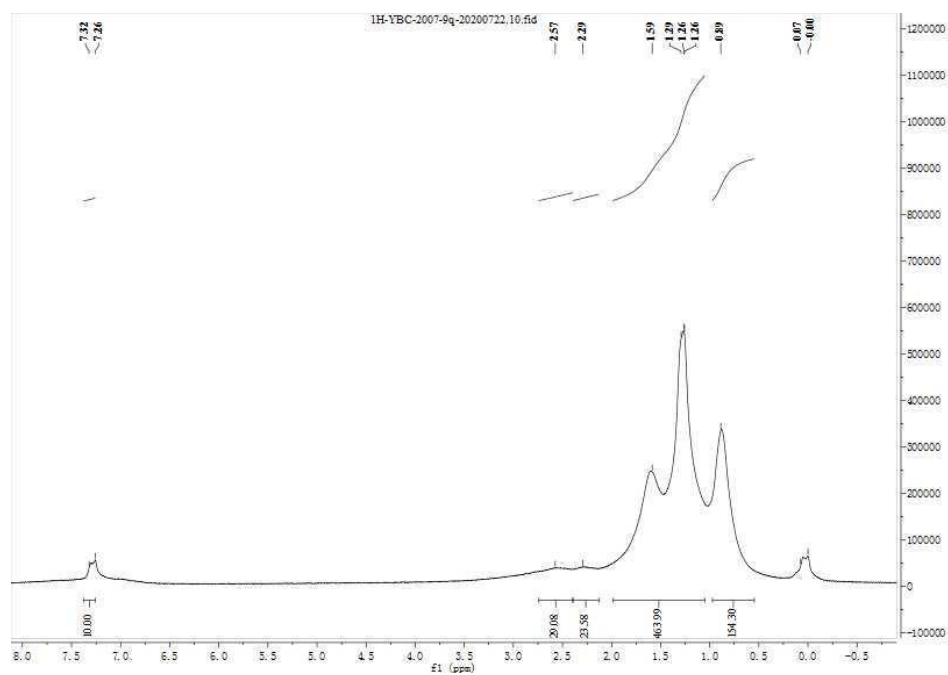

Figure S7. 9 zone blockage  $^1\text{H}$  NMR test results

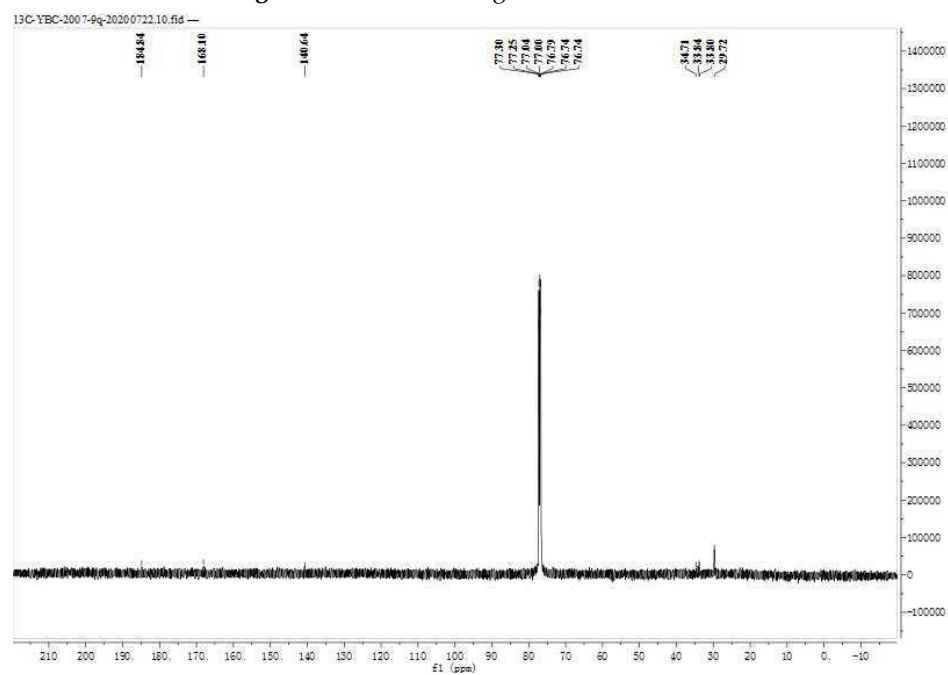

Figure S8. 9 zone blockage  $^{13}\text{C}$  NMR test results

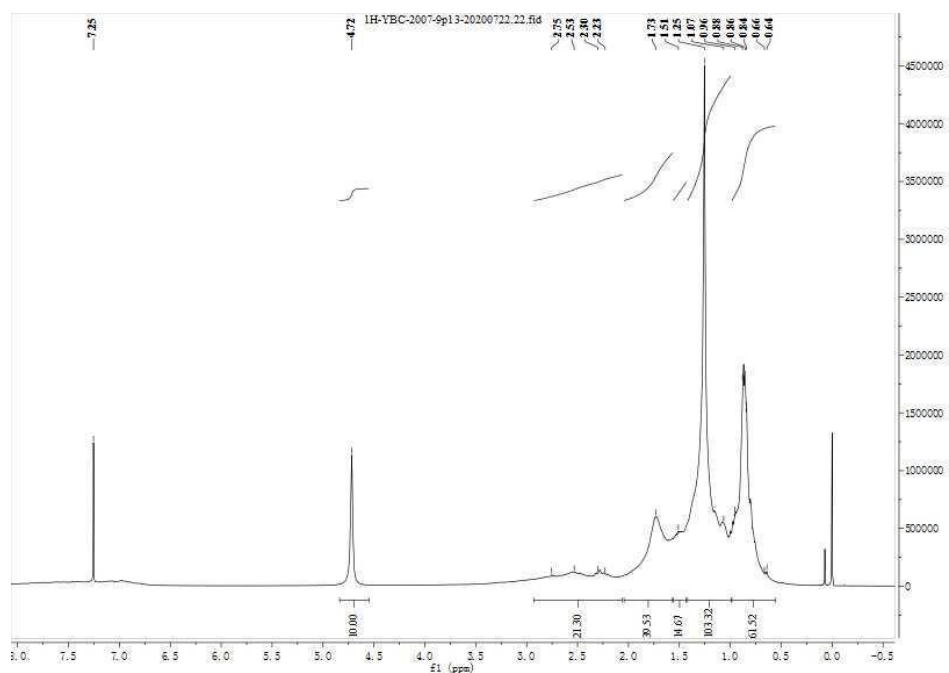

Figure S9. 9P13 well crude oil  $^1\text{H}$  NMR test results

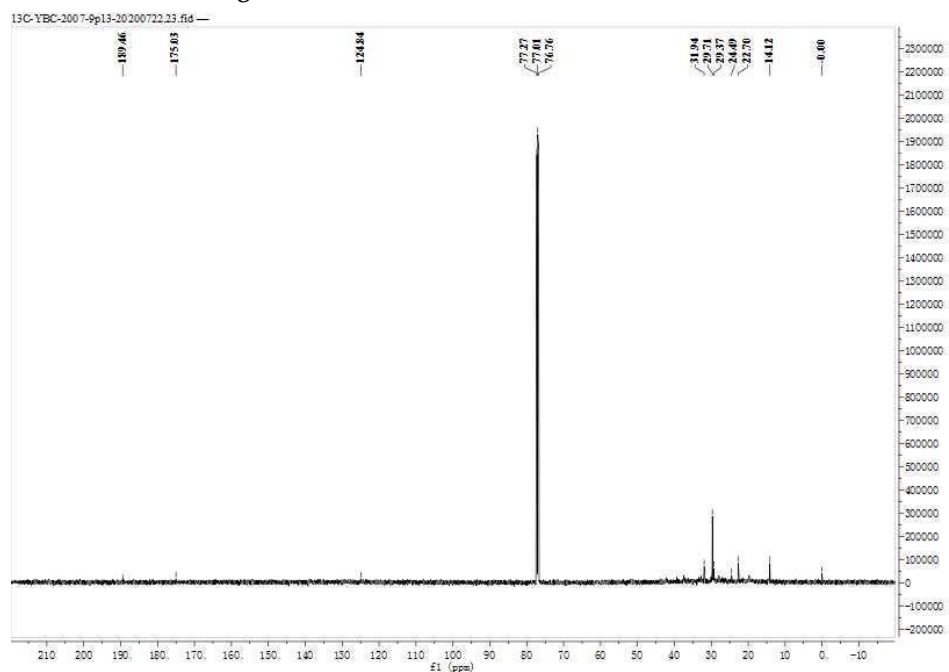

Figure S10. 9P13 well crude oil  $^{13}\text{C}$  NMR test results

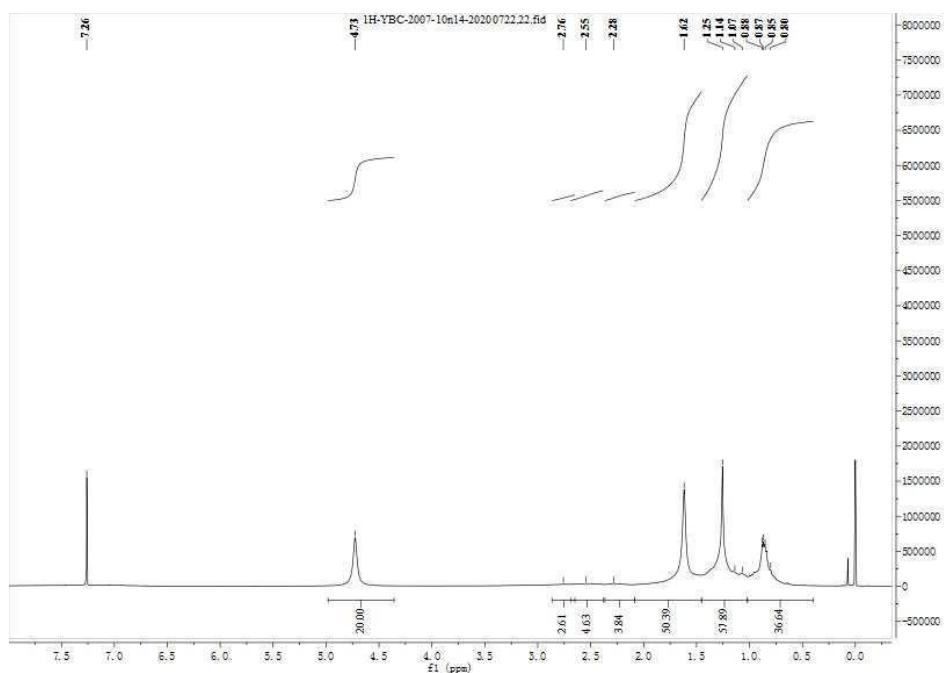

Figure S11. 10N14 well crude oil  $^1\text{H}$  NMR test results

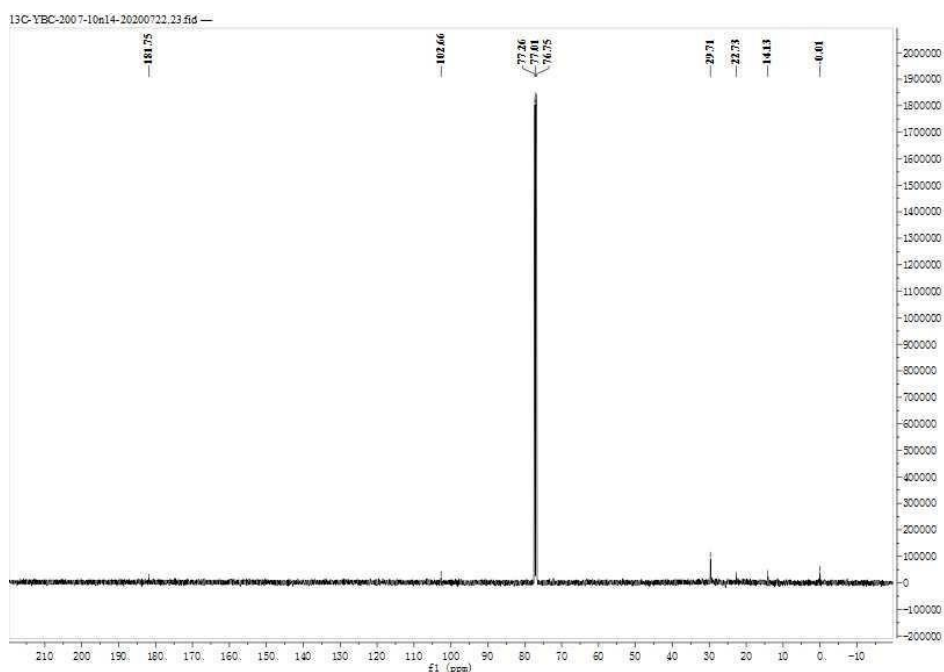

Figure S12. 10N14 well crude oil  $^{13}\text{C}$  NMR test results

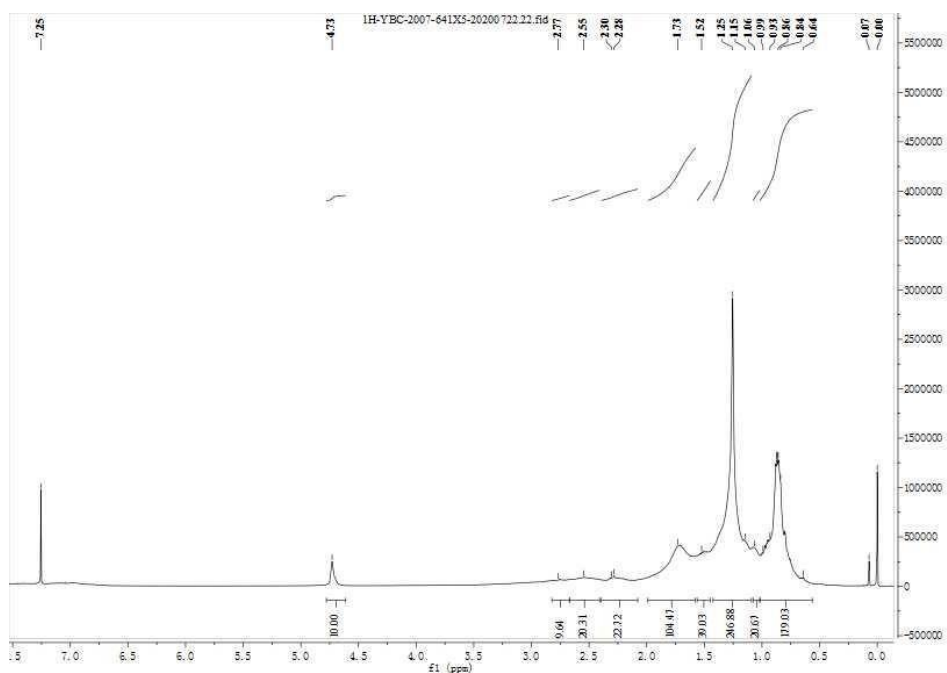

Figure S13. 641X5 well crude oil  $^1\text{H}$  NMR test results

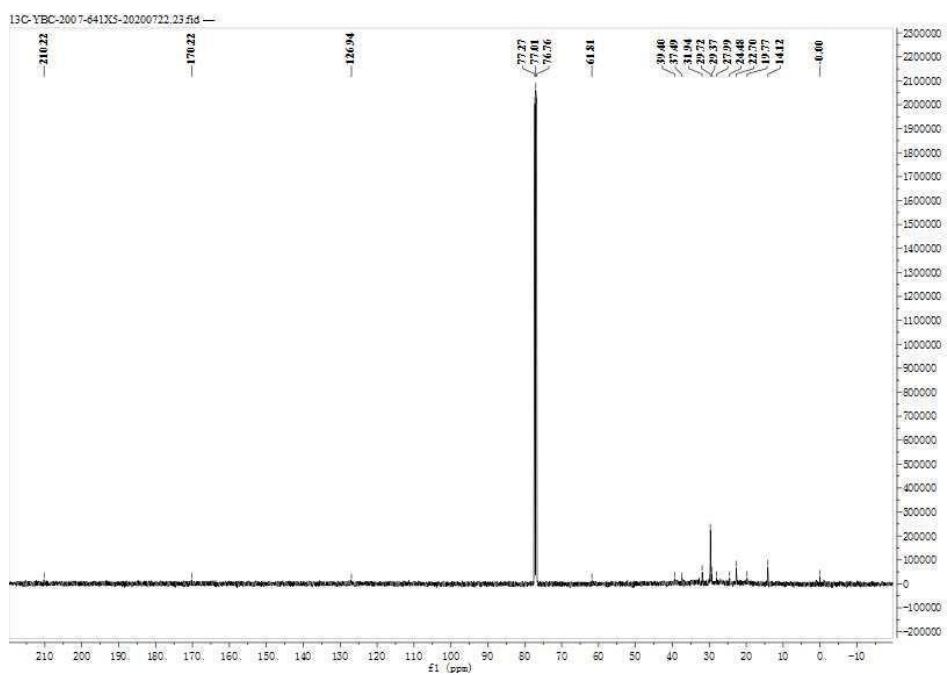

Figure S14. 641X5 well crude oil  $^{13}\text{C}$  NMR test results

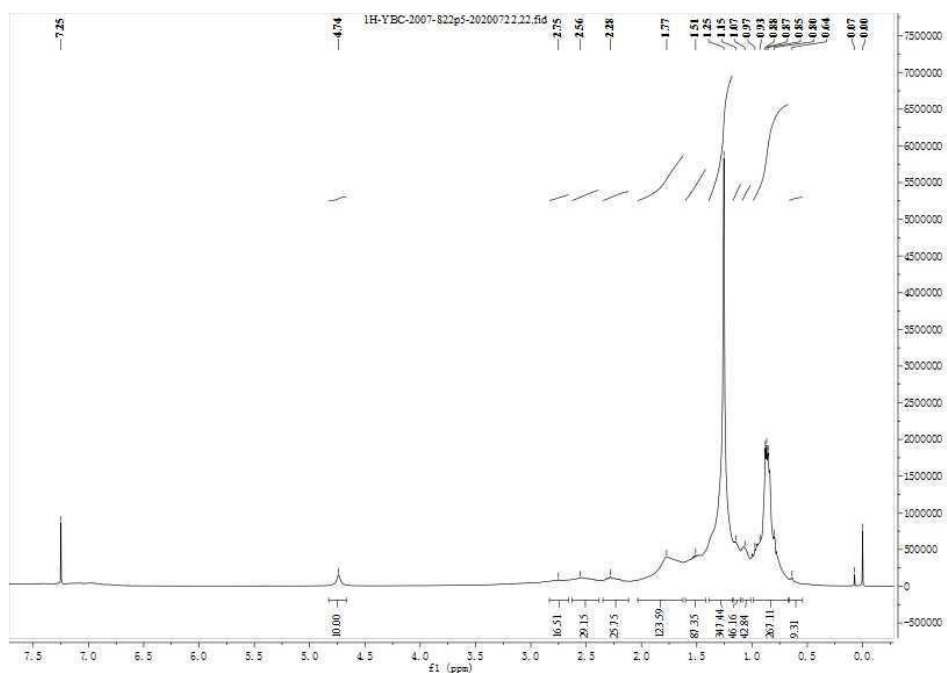

Figure S15. 822P5 well crude oil  $^1\text{H}$  NMR test results

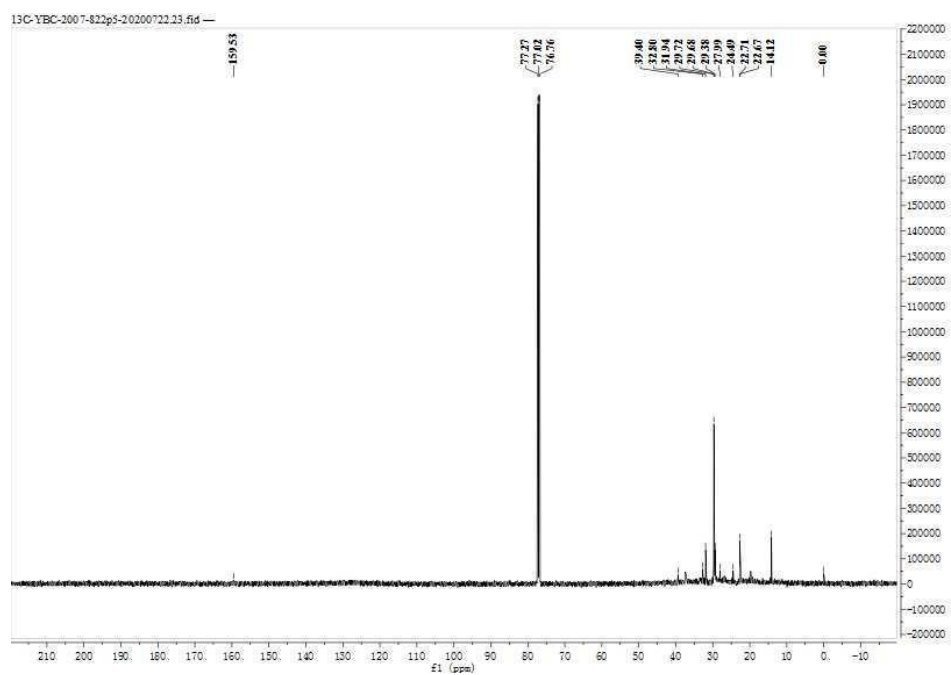

Figure S16. 822P5 well crude oil  $^{13}\text{C}$  NMR test results

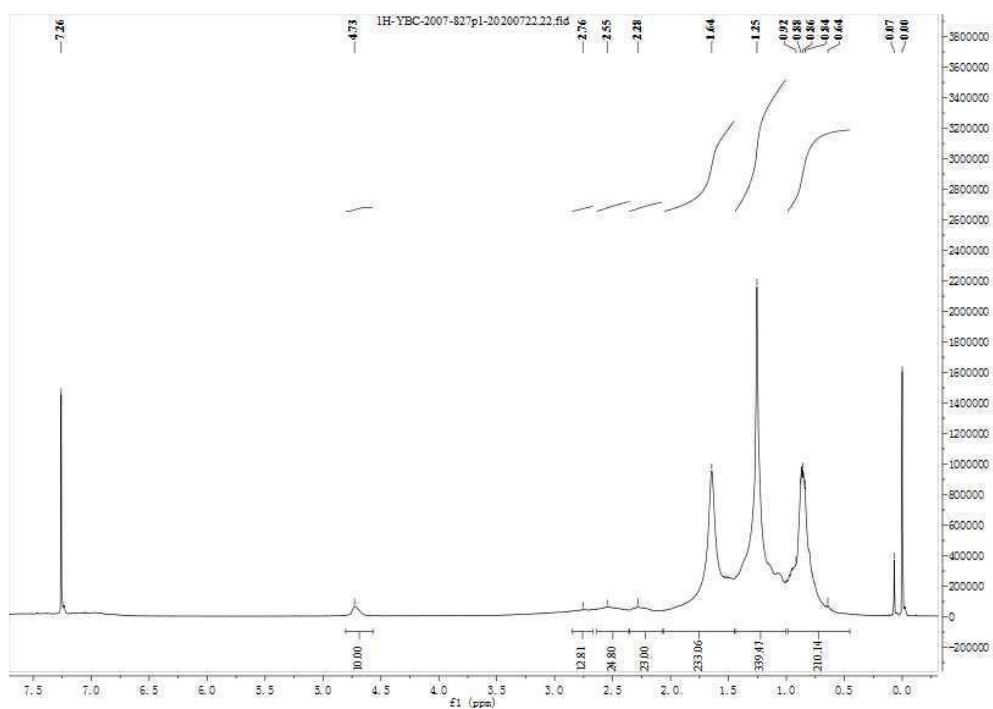

Figure S17. 827P1 well crude oil  $^1\text{H}$  NMR test results

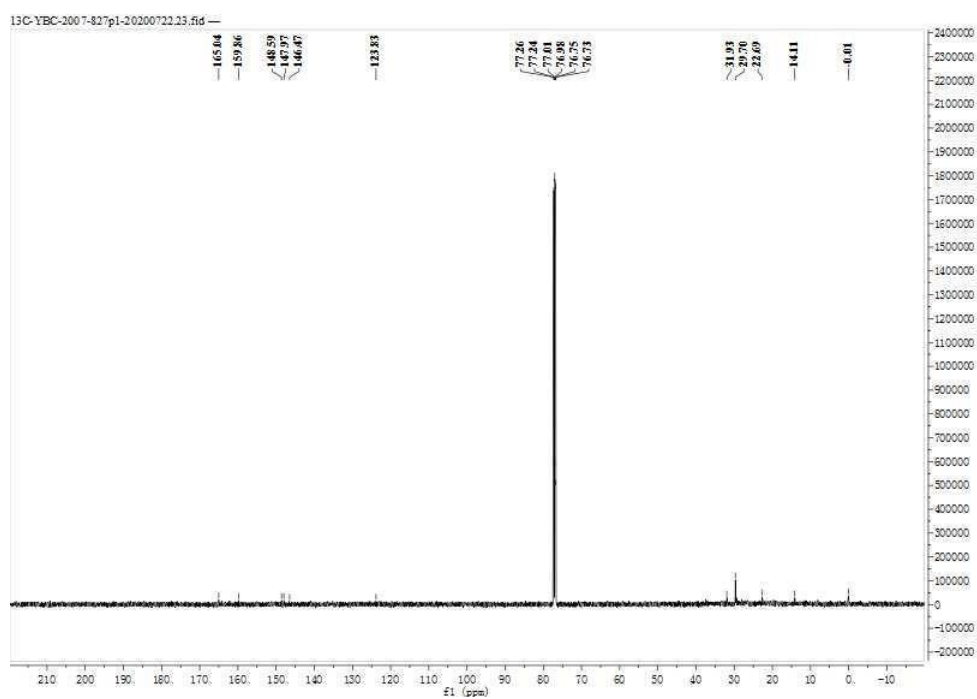

Figure S18. 827P1 well crude oil  $^{13}\text{C}$  NMR test results
